# Supplementary material for: Lifetime Prevalence and Factors Associated with Head Injury among Older People in Low and Middle Income Countries: A 10/66 Study
Source: PLOS journal article supplement (doi:10.1371/journal.pone.0132229), 2015-07-06

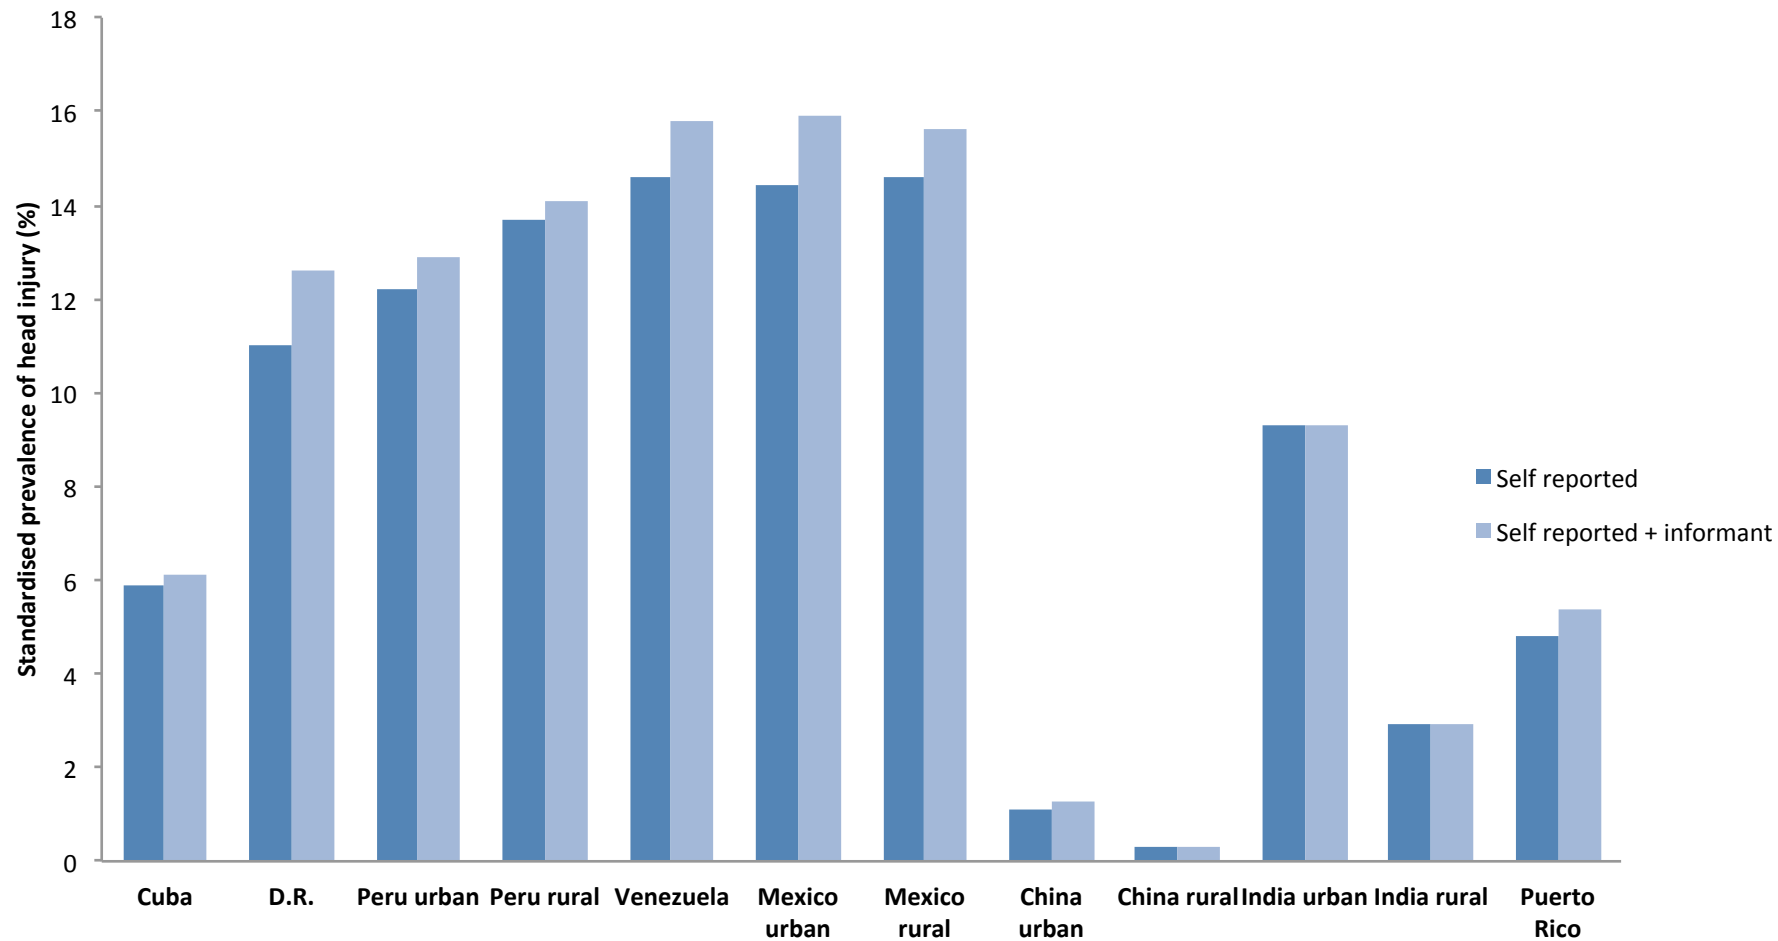

Supplement: S1 (10.1371/journal.pone.0132229.s001) [file journal.pone.0132229.s001]
